# Supplementary material for: UV-Visible-NIR Camouflage Textiles with Natural Plant Based Natural Dyes on Natural Fibre against Woodland Combat Background for Defence Protection
Source: Research Square preprint supplement (doi:10.21203/rs.3.rs-2126958/v1), 2023-01-04
Supplement: Supplementary file 1 [file 70b58cd02dcb09615f2f5e47.docx]

**UV-Visible-NIR Camouflage Textiles with Natural Plant Based Natural Dyes on Natural Fibre against Woodland Combat Background for Defence Protection**

Md. Anowar Hossain

School of Fashion and Textiles, RMIT University

25 Dawson Street, Brunswick, Melbourne, VIC 3056, Australia

**(engr.anowar@yahoo.com)**

Table 1. Experimental applications of listed NPND-materials for three-dimensional process of camouflage coloration (dyeing-coating-printing).

Table 2. Chemicals and formulations for coating and printing with NPND materials on cotton fabric.
